# Supplementary material
Source: bioRxiv or medRxiv preprint supplement (https://www.biorxiv.org/highwire/filestream/133399/field_highwire_adjunct_files/0/443838-1.pdf)
Supplement: Supplementary file [file 443838-1.pdf]

8909 peptides found [1014\_20180818-0107.txt]; median length [ 0.30]

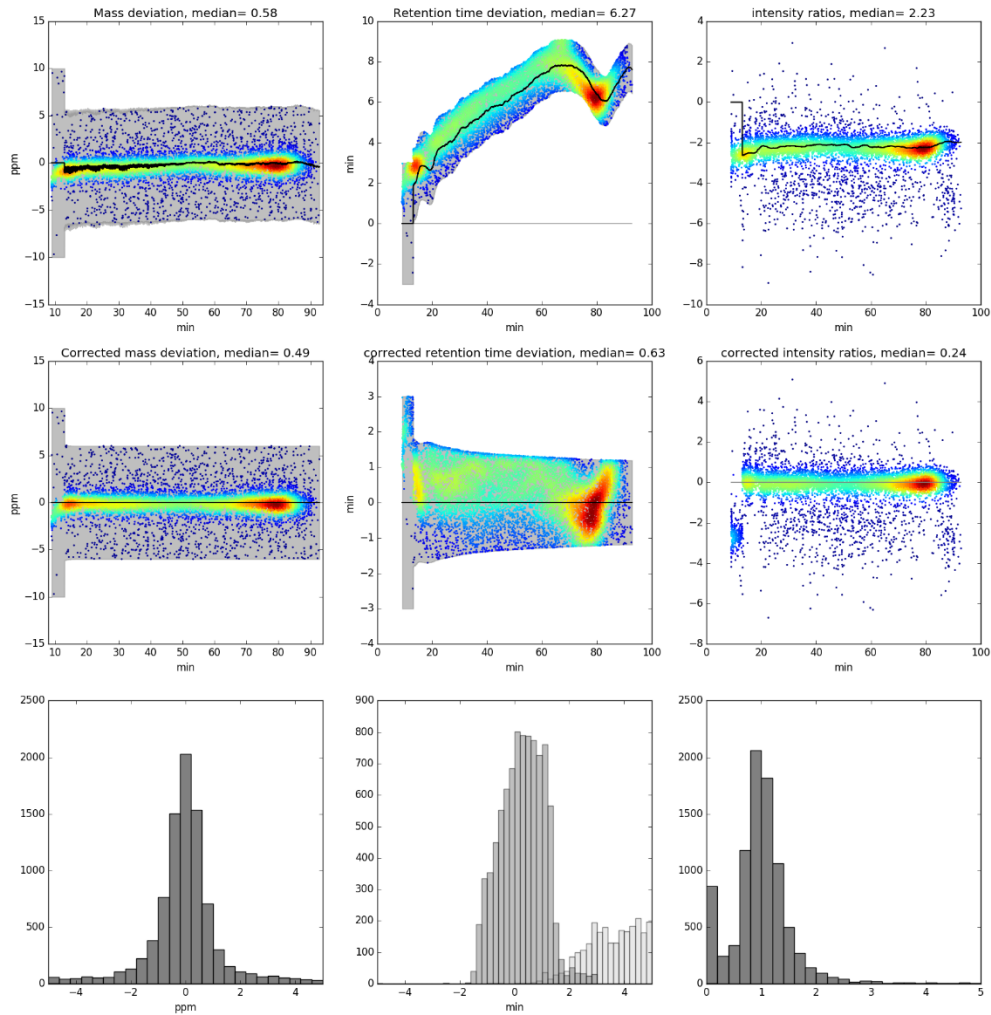

**Supplemental Figure 1.** Uncorrected (upper row) and corrected (middle row) deviations of recognized peptides during the targeted acquisition of breakdown curves. The columns represent the observed global shifts of the elution time (middle), mass calibration (left) and peptide intensity (right). The histograms in the lower row show the deviations from the corrected expectation values over the whole run. For the retention time deviations also the histogram for the uncorrected deviations is included (light gray).
